# Supplementary material for: Senescence as a dictator of patient outcomes and therapeutic efficacies in human gastric cancer
Source: Cell Death Discov. 2022 Jan 10;8:13. doi: 10.1038/s41420-021-00769-6 (PMC8748965; doi:10.1038/s41420-021-00769-6)
Supplement: Supplementary file 8 — Table S6 [file 41420_2021_769_MOESM8_ESM.xlsx]

## Sheet: Jung et al
ID	Cohort	GSM	Age	Gender	Therapy	PFS_status	Response	SRA	series_id	Senescore	Senescore_group	PFS_m
NSCLC378	Jung_GSE135222	GSM3995406	54	F	aPD1/aPDL1	0	R	SRX6631827	GSE135222	0.0168883	low	13.7333
NSCLC1104	Jung_GSE135222	GSM3995425	73	M	aPD1/aPDL1	1	NR	SRX6631846	GSE135222	0.0216393	low	0.966667
NSCLC947	Jung_GSE135222	GSM3995403	81	M	aPD1/aPDL1	0	R	SRX6631824	GSE135222	10.6364	high	20.6
NSCLC990	Jung_GSE135222	GSM3995402	68	M	aPD1/aPDL1	1	NR	SRX6631823	GSE135222	0.00231402	low	3.16667
NSCLC1203	Jung_GSE135222	GSM3995421	66	M	aPD1/aPDL1	1	NR	SRX6631842	GSE135222	0.170506	low	0.833333
NSCLC1327	Jung_GSE135222	GSM3995420	59	M	aPD1/aPDL1	0	R	SRX6631841	GSE135222	7750.13	high	6.83333
NSCLC1401	Jung_GSE135222	GSM3995417	65	F	aPD1/aPDL1	1	NR	SRX6631838	GSE135222	0.000135553	low	0.933333
NSCLC1155	Jung_GSE135222	GSM3995423	61	M	aPD1/aPDL1	1	NR	SRX6631844	GSE135222	2.18253e+08	high	1.13333
NSCLC573	Jung_GSE135222	GSM3995405	64	M	aPD1/aPDL1	1	NR	SRX6631826	GSE135222	0.336095	low	1.5
NSCLC825	Jung_GSE135222	GSM3995404	57	F	aPD1/aPDL1	1	NR	SRX6631825	GSE135222	0.106346	low	1.43333
NSCLC1528	Jung_GSE135222	GSM3995412	68	M	aPD1/aPDL1	0	R	SRX6631833	GSE135222	4.84046	high	9.3
NSCLC1508	Jung_GSE135222	GSM3995414	56	M	aPD1/aPDL1	1	NR	SRX6631835	GSE135222	0.00178089	low	2.16667
NSCLC1708	Jung_GSE135222	GSM3995409	69	M	aPD1/aPDL1	1	R	SRX6631830	GSE135222	1.79014e-08	low	5.6
NSCLC1352	Jung_GSE135222	GSM3995419	44	M	aPD1/aPDL1	0	R	SRX6631840	GSE135222	1.46847e-20	low	8.33333
NSCLC1066	Jung_GSE135222	GSM3995427	70	F	aPD1/aPDL1	1	NR	SRX6631848	GSE135222	0.00024549	low	0.766667
NSCLC1017	Jung_GSE135222	GSM3995428	38	M	aPD1/aPDL1	1	NR	SRX6631849	GSE135222	2.41357e-62	low	1.26667
NSCLC1358	Jung_GSE135222	GSM3995418	65	M	aPD1/aPDL1	1	R	SRX6631839	GSE135222	0.00387846	low	8.56667
NSCLC1510	Jung_GSE135222	GSM3995413	51	M	aPD1/aPDL1	0	R	SRX6631834	GSE135222	153823	high	10.8
NSCLC1164	Jung_GSE135222	GSM3995422	62	M	aPD1/aPDL1	1	NR	SRX6631843	GSE135222	0.0284076	low	0.366667
NSCLC1412	Jung_GSE135222	GSM3995416	59	M	aPD1/aPDL1	1	NR	SRX6631837	GSE135222	2.0275e-05	low	0.1
NSCLC1145	Jung_GSE135222	GSM3995424	60	M	aPD1/aPDL1	1	NR	SRX6631845	GSE135222	4.19154e+10	high	2.43333
NSCLC1425	Jung_GSE135222	GSM3995415	61	M	aPD1/aPDL1	1	NR	SRX6631836	GSE135222	4.8794e+07	high	1.96667
NSCLC1554	Jung_GSE135222	GSM3995411	56	M	aPD1/aPDL1	1	NR	SRX6631832	GSE135222	1.12655e-25	low	1.23333
NSCLC1619	Jung_GSE135222	GSM3995410	73	M	aPD1/aPDL1	1	NR	SRX6631831	GSE135222	1.09587e-52	low	2.73333
NSCLC1809	Jung_GSE135222	GSM3995408	68	M	aPD1/aPDL1	1	NR	SRX6631829	GSE135222	58.5262	high	1.46667
NSCLC1873	Jung_GSE135222	GSM3995407	66	M	aPD1/aPDL1	1	NR	SRX6631828	GSE135222	1.67831e-29	low	1.23333
NSCLC1079	Jung_GSE135222	GSM3995426	62	F	aPD1/aPDL1	1	NR	SRX6631847	GSE135222	9.21751e-09	low	5.8

## Sheet: Mariathasan, et al
Patient_ID	Best.Confirmed.Overall.Response	binaryResponse	FMOne.mutation.burden.per.MB	Sex	Race	Tobacco.Use.History	Met.Disease.Status	Tissue	Received.platinum	Sample.collected.pre.platinum	Neoantigen.burden.per.MB	os	censOS	TCGA.Subtype	Senescore	senescore_group
SAMf2ce197162ce	NE		3	M	WHITE	NEVER	Liver	ureter	Y	Y	0.568627	1.577	1	IV	0.689963	low
SAM698d8d76b934	NE		6	F	WHITE	NEVER	Visceral	bladder	Y	Y	1.01961	0.427105	1	IV	0.976174	low
SAMc1b27bc16435	PR	CR/PR	5	M	WHITE	PREVIOUS	Visceral	kidney	Y	Y	1.41176	24.1807	0	I	1.0877	low
SAM85e41e7f33f9	NE		10	M	WHITE	PREVIOUS	Visceral	bladder	N		1.2549	0.62423	1	IV	0.732532	low
SAMf275eb859a39	PR	CR/PR	9	M	BLACK OR AFRICAN AMERICAN	PREVIOUS	Visceral	bladder	Y	Y		24.4764	0	I	1.37308	high
SAM7f0d9cc7f001	PD	SD/PD		M	WHITE	NEVER	Liver	bladder	Y	Y		4.63244	1	II	1.05862	low
SAM4305ab968b90	PD	SD/PD	12	M	WHITE	PREVIOUS	Liver	bladder	Y	N	0.392157	1.41273	1	I	1.50592	high
SAMcf018fee2acd	PD	SD/PD		M	WHITE	PREVIOUS	Visceral	lung	Y	Y		16.23	1	I	1.1051	low
SAMb2f1d0e54ece	PR	CR/PR		M	WHITE	PREVIOUS	Visceral	bladder	Y	N	0.862745	11.4004	1	IV	0.581787	low
SAMcc4675f394a1	PD	SD/PD		M	WHITE	PREVIOUS	Liver	liver	Y	Y		3.12115	1	I	0.832426	low
SAM49f9b2e57aa5	PD	SD/PD	5	M	WHITE	PREVIOUS	Liver	kidney	Y	Y	1.45098	7.45791	1	I	0.960655	low
SAM2e7aa8fa0ab3	PD	SD/PD	14	M	WHITE	PREVIOUS	Visceral	kidney	N		2.70588	7.72074	1	II	0.791305	low
SAMd0e47be700b0	NE		5	M	WHITE	NEVER	Visceral	kidney	Y	Y		0.887064	1	II	1.23091	high
SAMdf3e42c8672a	PD	SD/PD	19	M	WHITE	PREVIOUS	Visceral	bladder	Y	Y	3.23529	7.32649	1	III	0.719588	low
SAMd027124354ce	CR	CR/PR	4	F	WHITE	NEVER		ureter	N		0.764706	23.5236	0	III	0.863053	low
SAM36d87392593b	SD	SD/PD	7	M	WHITE	NEVER	Visceral	ureter	Y	Y	0.352941	23.6879	0	III	1.2022	high
SAM4edbe45817b3	NE		26	M	WHITE	PREVIOUS		bladder	Y	Y	3.68627	1.05133	1	III	0.723307	low
SAM36a9225b0222	SD	SD/PD	1	M	ASIAN	PREVIOUS	Liver	bladder	Y	N	0.607843	23.8193	0	IV	0.698697	low
SAMe7bf6c015192	PD	SD/PD	7	M	WHITE	PREVIOUS	Visceral	kidney	N		1.37255	3.12115	1	III	0.911878	low
SAM6dd7ad1d797d	PD	SD/PD		M	WHITE	PREVIOUS	Visceral	bladder	Y	Y	3.56863	19.2854	1	III	0.66151	low
SAMc0d625a50eb8	SD	SD/PD	3	F	WHITE	NEVER	Visceral	bladder	Y	N	0.294118	13.2731	1	I	0.839666	low
SAM18039827e1b9	PD	SD/PD	15	M	WHITE	NEVER	Visceral	bladder	Y	N		1.47844	1	II	1.26355	high
SAM681e4bf7cf85	PR	CR/PR	7	M	WHITE	NEVER		bladder	Y	Y	1.86275	23.3922	0	I	0.805194	low
SAMc692536a795a	PD	SD/PD	10	M	WHITE	PREVIOUS		ureter	Y	Y		5.65092	1	II	1.07381	low
SAM9a2cf3c06fb3	PD	SD/PD	4	M	WHITE	PREVIOUS	Visceral	bladder	Y	Y	0.862745	5.65092	1	II	0.855119	low
SAM557dde1b9f3e	PD	SD/PD	5	M	WHITE	NEVER	Visceral	ureter	Y	Y		6.70226	1	I	0.933557	low
SAMb8f13a0525a6	NE		4	M	WHITE	NEVER	Liver	kidney	Y	Y	0.529412	2.69405	1	IV	0.931912	low
SAM23aa15d4a0b0	PD	SD/PD	5	F	WHITE	NEVER	Liver	kidney	Y	Y	0.333333	5.71663	1	II	0.946774	low
SAM468a9e1dc821	PD	SD/PD	8	M	WHITE	PREVIOUS	Visceral		Y	N		3.8768	1	IV	1.11428	low
SAM81b71522417a	PD	SD/PD	7	F	WHITE	PREVIOUS	Liver	bladder	N		1.07843	2.13552	1	I	1.1141	low
SAM6cb230f208a8	PR	CR/PR	20	M	WHITE	PREVIOUS	Visceral	lung	Y	Y	1.03922	23.2279	0	I	1.18665	high
SAM0684af734db1	PR	CR/PR	6	F	WHITE	PREVIOUS	Visceral	bladder	N		0.921569	23.2608	0	I	1.13444	high
SAMb963dda93cfd	PD	SD/PD	8	M	OTHER	CURRENT	Liver	bladder	Y	Y	0.882353	2.75975	1	IV	1.06253	low
SAMa9ca8536d2b1	SD	SD/PD	3	M	WHITE	PREVIOUS	LN Only	bladder	N		0.352941	21.848	0	III	0.617704	low
SAM9fb814c22bdb	SD	SD/PD	6	F	WHITE	PREVIOUS		bladder	N		0.431373	19.1211	1	III	0.627192	low
SAMbcbc7957c264	PD	SD/PD	9	M	WHITE	NEVER	Visceral	bladder	Y	Y		4.17248	1	I	1.20181	high
SAM7fb6987514a4	PD	SD/PD	1	M	BLACK OR AFRICAN AMERICAN	NEVER	Liver	bladder	Y	N		22.8337	0	III	1.02254	low
SAM63405b04ab2d	PD	SD/PD		M	WHITE	NEVER	Liver	bladder	Y	Y	0.156863	6.80082	1	II	1.0198	low
SAM18bc1078bc15	PD	SD/PD	19	M	WHITE	PREVIOUS	Visceral	bladder	N		1.80392	6.89938	1	II	1.799	high
SAM7d2dfba6cd84	SD	SD/PD	4	M	WHITE	CURRENT	Liver	lymph node	Y	Y	0.156863	12.7146	1	IV	0.766349	low
SAMd1bd63734394	PD	SD/PD	22	M	WHITE	PREVIOUS	Liver	bladder	Y	N		1.9384	1	III	1.17046	high
SAMe9ae8beb82fa	PD	SD/PD	7	M	WHITE	PREVIOUS		bladder	N		1.33333	5.48665	1	III	1.01491	low
SAMb0a83e5fbde9	SD	SD/PD	7	M	WHITE	PREVIOUS	Visceral	lung	Y	N	0.352941	23.3265	0	I	1.17479	high
SAMba7176afe070	PD	SD/PD	5	F	WHITE	NEVER	Visceral	kidney	Y	Y		3.44969	0	I	1.55293	high
SAMae1690469964	SD	SD/PD		M	BLACK OR AFRICAN AMERICAN	CURRENT	Visceral	ureter	Y	Y		21.1581	1	I	1.43187	high
SAMbe83eae4026e	PD	SD/PD	10	F	WHITE	NEVER	Liver	lymph node	Y	N	0.784314	2.7269	1	I	0.81607	low
SAMe5bc41772bc9	PD	SD/PD	5	M	WHITE	PREVIOUS	Liver	liver	Y	N	0.27451	6.11088	1	I	0.704876	low
SAM23095936e611	PD	SD/PD	5	F	WHITE	PREVIOUS	Liver	bladder	Y	Y	0.235294	2.23409	1	I	1.26028	high
SAM7114d99032ec	PD	SD/PD	17	M	WHITE	NEVER	Visceral	bladder	Y	Y	2.17647	10.8419	1	I	1.00847	low
SAMd215b503f99a	SD	SD/PD		M	WHITE	NEVER	Visceral	bladder	Y	N		1.70842	0	I	1.01575	low
SAMdb3f50c9129c	PD	SD/PD	10	M	WHITE	CURRENT	Visceral	bladder	Y	N	0.509804	15.8029	1	IV	0.764166	low
SAMbf1a3ae828e6	CR	CR/PR	35	M	WHITE	PREVIOUS	Visceral	bladder	Y	N	3.7451	20.731	0	II	0.950928	low
SAM52e3fa3ad574	PD	SD/PD	4	M	WHITE	PREVIOUS	Liver	lymph node	Y	N	0.254902	7.95072	1	II	1.12794	high
SAMd4c0837b0997	PD	SD/PD	5	M	WHITE	PREVIOUS	Liver	kidney	N		0.529412	5.38809	1	III	1.13789	high
SAM9cafb905b36a	PD	SD/PD	12	M	WHITE	PREVIOUS	LN Only	kidney	Y	Y	0.588235	7.62218	1	IV	0.743953	low
SAM3f2033c90438	NE			M	WHITE	PREVIOUS	Liver	lymph node	Y	N		0.821355	1	II	1.08837	low
SAM032c642382a7	PD	SD/PD	44	F	WHITE	PREVIOUS	Visceral	bladder	Y	Y	6.19608	2.49692	1	IV	0.93922	low
SAM5ffd7e4cd794	NE			M	WHITE	PREVIOUS		liver	Y	N		1.21561	1	I	1.07346	low
SAMb419a8fcbfcd	PR	CR/PR	19	M	WHITE	PREVIOUS	Liver	bladder	Y	N		22.7351	0	IV	1.20617	high
SAM8884fe446d20	PR	CR/PR	13	M	WHITE	NEVER		bladder	Y	N	6	23.1622	0	III	0.713646	low
SAM17c45bf16bb6	NE		5	M	WHITE	NEVER	Liver	kidney	N		0.431373	2.69405	1	I	1.35522	high
SAM2070b416069c	SD	SD/PD	5	M	WHITE	NEVER	Liver	kidney	Y	Y	0.294118	8.01643	1	I	1.32241	high
SAM0ce9c983b20f	PD	SD/PD	9	M	WHITE	NEVER		ureter	Y	Y		6.6037	1	III	0.896668	low
SAMa1e62d323e1d	SD	SD/PD	15	F	WHITE	PREVIOUS	Visceral	bladder	Y	N	0.921569	10.5791	1	II	1.27422	high
SAM61baf919bb01	SD	SD/PD		F	WHITE	NEVER	Visceral	lymph node	Y	N		15.6057	1	I	0.822415	low
SAM97a00e0929fb	PR	CR/PR	18	M	OTHER	PREVIOUS	Liver	kidney	N		2.86275	12.7146	0	II	1.08166	low
SAM2f228939632f	PD	SD/PD	8	F	BLACK OR AFRICAN AMERICAN	NEVER	Liver	bladder	Y	N	0.45098	7.88501	1	IV	0.862043	low
SAM9539a4f19ebc	SD	SD/PD		M	WHITE	NEVER	Liver	bladder	Y	N	0.431373	7.95072	1	I	1.03196	low
SAM36851bc8b9ae	SD	SD/PD	7	M	WHITE	PREVIOUS	Visceral	bladder	Y	Y	0.333333	3.54825	1	I	1.02179	low
SAM297c0301e861	PD	SD/PD	1	M	WHITE	NEVER	Liver	bladder	Y	N		8.08214	1	IV	0.677946	low
SAM1fa6bcb7fc48	PD	SD/PD	8	M	WHITE	CURRENT	Visceral	bladder	Y	Y	1.23529	22.7351	0	I	1.16867	high
SAM075e037d95bc	PR	CR/PR	11	M	WHITE	NEVER	Visceral	kidney	Y	Y	0.745098	21.3224	0	I	0.843317	low
SAM6d2ae0c39b96	PD	SD/PD		M	BLACK OR AFRICAN AMERICAN	CURRENT	LN Only	lymph node	Y	Y		22.1109	0	I	1.21719	high
SAMcabb6d58ff55	SD	SD/PD	11	F	BLACK OR AFRICAN AMERICAN	NEVER	Visceral	lung	Y	N	1.35294	20.271	0	IV	0.684003	low
SAM716f54e468f4	SD	SD/PD	6	M	WHITE	NEVER	Liver	kidney	Y	Y	1.56863	21.191	0	II	1.07192	low
SAMeff2ce356ccb	PD	SD/PD	14	M	WHITE	NEVER	Visceral	ureter	Y	Y		8.08214	1	I	1.43146	high
SAM110501d0eedb	PD	SD/PD	21	M	WHITE	NEVER	LN Only	bladder	Y	Y	3.52941	4.27105	1	II	1.30058	high
SAM2e9ac0b1b250	CR	CR/PR	18	M	WHITE	PREVIOUS		bladder	Y	Y	1.76471	22.1437	0	IV	0.864112	low
SAMc0ef41aa6c8b	PD	SD/PD	5	M	WHITE	NEVER	Visceral		Y	N	0.960784	9.56057	1	I	1.43346	high
SAMd636e3461955	PD	SD/PD		M	WHITE	PREVIOUS	LN Only	bladder	Y	Y	0.196078	10.4805	1	IV	0.665263	low
SAMe712352fb82a	PR	CR/PR		M	WHITE	PREVIOUS		bladder	Y	Y		22.1109	0	II	1.33402	high
SAM30b5c6c54cf7	CR	CR/PR	6	F	WHITE	PREVIOUS	LN Only	bladder	Y	N		9.26489	1	IV	0.839445	low
SAMd98bac0a070f	PD	SD/PD	8	M	WHITE	PREVIOUS	Liver	ureter	Y	N	0.72549	2.06982	1	III	0.878749	low
SAM8e8ef2368dfa	PD	SD/PD	6	M	WHITE	CURRENT	Visceral	kidney	Y	N	0.509804	4.50103	1	IV	0.714934	low
SAM08cce2fa88f2	SD	SD/PD		F	WHITE	CURRENT	Visceral	bladder	Y	Y		22.1109	0	I	0.879366	low
SAMb4c7a001537d	PD	SD/PD	5	M	WHITE	PREVIOUS	Visceral	kidney	Y	Y		3.18686	1	I	0.795686	low
SAMfd947610629d	PD	SD/PD	5	M	WHITE	PREVIOUS	Visceral	bladder	Y	N		9.03491	1	I	0.89873	low
SAM943df5cf15df	PD	SD/PD	5	M	WHITE	PREVIOUS	Visceral	bladder	Y	N	0.117647	2.13552	1	III	0.880687	low
SAM31f41dd0d6ca	SD	SD/PD		F	WHITE	PREVIOUS		lymph node	Y	N	0.705882	8.27926	1	I	1.00462	low
SAMb3c02294aba7	PR	CR/PR	18	M	WHITE	PREVIOUS	Visceral	other	Y	N		22.4066	0	II	0.773079	low
SAM39eb94fa504d	PD	SD/PD	6	M	WHITE	PREVIOUS	Visceral	bladder	Y	Y		17.9055	1	III	1.02401	low
SAM62fb1388c871	PD	SD/PD	5	F	WHITE	PREVIOUS	Visceral	kidney	Y	N	0.784314	22.5051	0	IV	1.16104	high
SAMc0da5d48686d	PD	SD/PD	5	M	WHITE	NEVER	Visceral	bladder	Y	Y	1.17647	9.49487	1	IV	0.729038	low
SAMe7bcab05402e	SD	SD/PD		M	WHITE	PREVIOUS	Visceral	kidney	Y	N		7.91786	1	I	0.821899	low
SAM2570ff4aae6e	PR	CR/PR	12	F	WHITE	CURRENT	LN Only	lymph node	Y	N	1.52941	22.3737	0	III	0.822153	low
SAM2dc3f04e45e9	PD	SD/PD		M	WHITE	PREVIOUS	Liver	kidney	Y	N		10.1848	1	II	1.39919	high
SAM9448d858692c	NE		8	M	WHITE	PREVIOUS	Liver	kidney	Y	N		2.03696	1	II	0.850758	low
SAM4501e41e4751	PD	SD/PD	6	M	WHITE	NEVER	Liver	bladder	Y	Y	0.921569	1.11704	1	III	0.721528	low
SAM714285adf612	NE		5	M	WHITE	NEVER	Liver	kidney	Y	Y	0.980392	0.62423	1	IV	0.970145	low
SAM5b57e47fdcb3	PD	SD/PD	12	F	ASIAN	NEVER	Liver	ureter	Y	Y		3.84394	1	I	1.82872	high
SAMae4da274eded	PD	SD/PD		F	WHITE	NEVER	Liver	bladder	Y	Y		4.99384	1	II	1.16862	high
SAMd35318127278	CR	CR/PR	62	M	WHITE	PREVIOUS	LN Only	kidney	N		10.0196	21.5852	0	II	1.8686	high
SAMa913c6139ec8	SD	SD/PD		M	WHITE	NEVER	Visceral	kidney	Y	N	1.52941	5.12526	1	II	0.811402	low
SAM75142fcab9df	PD	SD/PD	7	F	WHITE	NEVER	LN Only	kidney	Y	Y	0.27451	11.9261	1	I	1.07818	low
SAMd697ba701077	SD	SD/PD		F	WHITE	PREVIOUS	LN Only	ureter	Y	Y		21.1581	1	II	1.40732	high
SAM166a419a4e5a	PD	SD/PD	5	M	WHITE	PREVIOUS	Visceral	bladder	Y	N	0.27451	5.38809	1	IV	0.736611	low
SAM025b45c27e05	PD	SD/PD	1	M	WHITE	PREVIOUS	Liver	bladder	Y	N	0.313725	8.77207	1	III	0.91995	low
SAMe07c4560772d	PD	SD/PD	5	F	OTHER	NEVER	Visceral	ureter	Y	Y	0.54902	2.10267	0	I	1.62861	high
SAM2dc578e0165f	NE		8	M	ASIAN	PREVIOUS	Visceral	bladder	Y	Y		1.97125	1	IV	1.21919	high
SAM3785587846ce	NE		9	F	WHITE	PREVIOUS	Liver	ureter	Y	Y		7.06366	1	I	1.40228	high
SAM560f23d6a3ad	CR	CR/PR	19	M	NATIVE HAWAIIAN OR OTHER PACIFIC ISLANDER	PREVIOUS		other	Y	Y	0.647059	21.3881	0	IV	1.55083	high
SAM52500cabdd36	SD	SD/PD	12	F	OTHER	PREVIOUS	LN Only	ureter	Y	Y	0.745098	20.4682	0	II	1.53634	high
SAM14df63a65411	PR	CR/PR	7	F	WHITE	PREVIOUS	Liver	bladder	Y	Y	0.568627	21.4209	0	III	1.1918	high
SAMf3a9bce50099	PD	SD/PD	4	F	ASIAN	PREVIOUS	LN Only	kidney	Y	Y		2.10267	0	II	0.898887	low
SAMffa5c7cad0e5	PR	CR/PR	10	M	WHITE	PREVIOUS	Visceral	other	Y			15.54	1	IV	0.819566	low
SAMdab9ca8fb5de	PD	SD/PD	14	M	WHITE	PREVIOUS	Liver	bladder	N		2.92157	0.197125	0	I	0.924216	low
SAM34430ef08e5b	PD	SD/PD		M	WHITE	NEVER	Visceral	bladder	Y	Y		18.1684	0	IV	0.878405	low
SAM4b0175e8db6e	PD	SD/PD	6	M	WHITE	PREVIOUS	Liver	kidney	Y	Y		2.06982	1	I	1.01699	low
SAMf28c01545593	SD	SD/PD	8	M	WHITE	PREVIOUS	Visceral	bladder	Y	Y		6.40657	1	I	1.39671	high
SAMaec7380f9ab0	PR	CR/PR	4	M	WHITE	NEVER		ureter	N			20.8624	0	IV	0.895828	low
SAMaf7578d55754	NE			F	WHITE	PREVIOUS		other	Y	N	2.66667	0.229979	1	II	1.02141	low
SAMbd8ee73983b8	NE		9	M	WHITE	NEVER	LN Only	bladder	Y	N	1.01961	0.854209	1	II	0.816275	low
SAMe94c30c30616	SD	SD/PD	6	M	WHITE	PREVIOUS	Visceral	bladder	Y	Y	1.01961	15.3758	1	I	0.891679	low
SAM54e58f1b0230	PD	SD/PD	5	M	WHITE	NEVER	Liver	bladder	Y	N		4.36961	1	I	0.924005	low
SAM5e3bae090b8c	PD	SD/PD	6	M	WHITE	PREVIOUS	Liver	kidney	Y	Y	0.823529	6.73511	1	I	1.11403	low
SAM3cb94b0d5297	PD	SD/PD	15	M	WHITE	CURRENT	Visceral	kidney	Y	Y	2.23529	5.05955	1	IV	0.963316	low
SAM61b9d4d84c64	SD	SD/PD	27	M	WHITE	PREVIOUS	Liver	bladder	Y	Y	5.88235	21.3881	0	I	1.22279	high
SAM8a42c0d59187	NE		3	M	WHITE	NEVER	Liver		Y	N	0.27451	2.82546	1	III	1.13625	high
SAMcb132b0cdd2c	PD	SD/PD		M	WHITE	CURRENT	LN Only	lymph node	Y	N	0.843137	2.52977	1	II	0.943495	low
SAMe97af0feefdf	PD	SD/PD	3	F	WHITE	PREVIOUS	Visceral	bladder	Y	N	0.705882	11.1047	1	I	1.18018	high
SAMee3844cc0b9f	PD	SD/PD		M	WHITE	PREVIOUS	Visceral	lymph node	Y	N		3.21971	1	I	0.904858	low
SAM73b653ae20d1	NE		3	F	WHITE	NEVER	Visceral	other	Y	Y	0.960784	1.80698	1	III	0.552375	low
SAMdcae54fcd7fa	SD	SD/PD		M	WHITE	PREVIOUS	LN Only	kidney	Y	N	1.43137	6.2423	1	II	0.921357	low
SAMdad5c29dc105	PD	SD/PD	5	M	WHITE	CURRENT	Visceral	bladder	Y	Y	0.666667	2.43121	1	II	0.832546	low
SAMa424c75831b4	PD	SD/PD	6	M	WHITE	PREVIOUS	Visceral	bladder	Y	N	0.686275	3.54825	1	II	0.983961	low
SAM28687037e4ff	SD	SD/PD	6	M	WHITE	PREVIOUS	Visceral	kidney	Y	Y	0.568627	21.5852	0	III	0.686266	low
SAMe50d15fde368	PR	CR/PR	9	F	WHITE	PREVIOUS	Visceral	bladder	Y	Y	2.17647	18.8912	0	I	1.19426	high
SAM45c8e6412c66	PD	SD/PD	5	M	WHITE	PREVIOUS	LN Only	bladder	Y	N	1.39216	3.48255	1	III	0.878642	low
SAM8533e5e261d6	PR	CR/PR	5	M	WHITE	PREVIOUS	Visceral	bladder	Y	N	1.72549	12.8131	1	I	1.38944	high
SAMaaf505c36f93	PR	CR/PR	15	M	WHITE	PREVIOUS	LN Only	kidney	Y	Y	1.72549	20.5667	0	I	1.20143	high
SAM73663ee4a96e	CR	CR/PR		M	WHITE	PREVIOUS	LN Only	kidney	N			21.2567	0	I	1.05431	low
SAM0bdb3428bd13	PD	SD/PD		F	WHITE	NEVER	Visceral	lymph node	Y	N		2.23409	1	II	0.952374	low
SAM3330c03fdf00	PD	SD/PD	2	M	WHITE	NEVER	LN Only	lymph node	Y	N		19.1869	0	IV	1.26261	high
SAM0a7c2091dd56	PD	SD/PD	8	M	WHITE	NEVER	Visceral	bladder	Y	N	1.27451	2.62834	1	III	0.533987	low
SAM7bff231634e9	SD	SD/PD		M	WHITE	PREVIOUS	Visceral	ureter	Y	Y	0.72549	10.2505	1	III	1.01151	low
SAM5d1dfd5207f5	PD	SD/PD	12	M	WHITE	NEVER	Visceral	bladder	Y	N		10.9076	1	I	1.29952	high
SAMeb587a68006b	SD	SD/PD		M	WHITE	PREVIOUS	LN Only	bladder	N			20.6982	0	II	0.7994	low
SAM99a46b9eec27	PD	SD/PD	5	M	WHITE	PREVIOUS	Liver	kidney	Y	Y	0.72549	3.61396	1	I	0.889494	low
SAM1ac4e3dee297	PD	SD/PD	2	M	WHITE	PREVIOUS	Liver	kidney	N		0.647059	5.51951	1	I	0.94819	low
SAM553c3c35b847	PD	SD/PD		F	WHITE	PREVIOUS	Liver	kidney	Y	Y		6.70226	1	IV	0.758184	low
SAM3e04eb914f3d	PR	CR/PR	17	M	WHITE	NEVER	Liver	lymph node	Y	N	1.41176	17.2813	0	I	1.00085	low
SAMc2a1820d4e6b	CR	CR/PR		M	WHITE	NEVER	LN Only	bladder	Y	N		20.731	0	I	0.733949	low
SAM822b226466a1	SD	SD/PD		M	WHITE	PREVIOUS	Visceral	other	Y	Y	1.09804	17.2813	0	I	1.30389	high
SAMabc151b01ea3	PD	SD/PD		F	WHITE	NEVER	Liver	bladder	Y	N		0.558522	1	IV	0.653955	low
SAMe1eb5d988760	CR	CR/PR	14	M	WHITE	PREVIOUS	Liver	bladder	Y	Y	2.27451	21.0595	0	I	1.04286	low
SAMe3210d3632b4	PD	SD/PD	17	F	WHITE	NEVER	LN Only		Y	N	0.862745	2.16838	1	III	0.649706	low
SAMb15ad09d6e24	PD	SD/PD	4	F	WHITE	NEVER	LN Only	bladder	Y	Y		3.8768	1	IV	0.791944	low
SAM7893196e0e89	PD	SD/PD	5	M	ASIAN	PREVIOUS	Visceral	bladder	Y	N	0.941176	2.66119	1	III	0.930116	low
SAM3f446449bf81	NE			M	WHITE	NEVER	LN Only	bladder	Y	N	0.980392	0.755647	1	I	1.30976	high
SAM961d04c42bd9	PD	SD/PD	17	M	WHITE	CURRENT	Visceral	bladder	Y	N	1.72549	5.8809	1	I	1.01193	low
SAMb0d11db9aa79	PD	SD/PD	3	F	WHITE	NEVER	Visceral	lung	Y	N	0.843137	10.5462	1	I	1.32069	high
SAM19fec8f3b3bd	PD	SD/PD	5	M	WHITE	PREVIOUS	Liver	bladder	Y	Y	0.431373	9.88912	1	III	0.568901	low
SAM6083aac8db99	PR	CR/PR	14	M	WHITE	PREVIOUS	Visceral	bladder	Y	Y		20.6324	0	II	1.01005	low
SAM7ee2b6e4d6b3	NE		36	M	WHITE	PREVIOUS	Visceral	kidney	Y	Y	6.80392	1.70842	1	I	1.16989	high
SAMa90d73f8d891	PD	SD/PD	12	M	WHITE	PREVIOUS	Visceral	other	Y	N	0.72549	1.01848	1	III	0.675224	low
SAMaff272833538	NE		5	M	WHITE	NEVER	Liver	kidney	Y	Y	1.27451	2.13552	1	I	0.895413	low
SAM415f36ad349e	PD	SD/PD		M	WHITE	PREVIOUS	LN Only	bladder	Y	N	0.431373	17.9713	1	IV	0.762252	low
SAM7c67b05aa109	SD	SD/PD	5	F	WHITE	NEVER	Visceral	bladder	Y	Y	0.529412	8.24641	1	I	1.03595	low
SAMad83c9c53537	PD	SD/PD	6	M	WHITE	PREVIOUS	Visceral	kidney	Y	Y	0.745098	14.9815	0	I	1.0641	low
SAM3e8baff50d7a	SD	SD/PD	11	M	WHITE	NEVER	Liver	kidney	Y	N	1.21569	6.96509	1	II	1.29458	high
SAM3ee5dcd894f0	PD	SD/PD		M	WHITE	CURRENT	Visceral	bladder	Y	N		8.70637	1	I	1.10625	low
SAM8a1b0e02ee42	CR	CR/PR	14	M	ASIAN	NEVER	LN Only	bladder	Y	Y	0.843137	20.5667	0	II	1.15559	high
SAMd7d57ee3a863	CR	CR/PR	24	M	WHITE	PREVIOUS		bladder	Y			20.271	0	IV	0.779947	low
SAMeb29625f76a5	PD	SD/PD	2	M	WHITE	PREVIOUS	Visceral	kidney	Y	Y	0.0588235	3.12115	1	I	0.940891	low
SAM563d6233dfa2	PD	SD/PD		M	WHITE	PREVIOUS	Liver	bladder	Y	N	0.607843	2.13552	1	IV	1.16583	high
SAM4581bac493af	NE		16	M	WHITE	NEVER	LN Only	bladder	Y	Y	3	20.0411	0	II	1.62768	high
SAMa1871f491b02	PD	SD/PD		F	WHITE	NEVER	Liver	bladder	Y	Y	3.33333	1.74127	1	I	1.32311	high
SAM30cf07d4874f	SD	SD/PD		M	WHITE	NEVER	Liver	bladder	Y	N		11.6632	1	II	0.724578	low
SAM31291c256373	NE		32	M	WHITE	CURRENT	Visceral	other	Y	N	3.21569	1.1499	1	II	1.18059	high
SAMd135d5867fe3	PD	SD/PD	3	M	WHITE	PREVIOUS	Visceral	bladder	Y	Y	0.607843	3.61396	1	IV	0.708407	low
SAM9e11ec6bea80	SD	SD/PD	10	M	WHITE	PREVIOUS	Visceral	bladder	Y	N		15.4086	1	IV	1.04677	low
SAM065890737112	CR	CR/PR	8	M	WHITE	PREVIOUS	LN Only	bladder	Y	Y		20.0739	0	II	1.4359	high
SAMb470eb8f04be	CR	CR/PR	35	M	WHITE	NEVER	LN Only	bladder	Y	Y		20.0739	0	I	0.951001	low
SAM675a12a09c15	PD	SD/PD	13	M	WHITE	PREVIOUS	Liver	bladder	Y	N	1.2549	2.89117	1	I	1.00269	low
SAM1e9c4d1d39ae	PD	SD/PD	5	F	WHITE	PREVIOUS	Liver	bladder	Y	Y	1.43137	12.4189	1	II	1.5215	high
SAM5a2347c0498a	SD	SD/PD	9	M	WHITE	NEVER	Visceral	bladder	Y	Y	1.33333	4.89528	1	II	1.67231	high
SAM0571f17f4045	SD	SD/PD	2	F	WHITE	PREVIOUS	LN Only	lymph node	Y		1.47059	4.53388	1	II	1.24402	high
SAM4b7ea015fd9e	PD	SD/PD		F	WHITE	NEVER	Visceral	kidney	Y	N		13.2731	1	I	1.1719	high
SAM9306c5c92444	PD	SD/PD	12	M	WHITE	NEVER	Visceral	bladder	Y		2.23529	15.4415	0	II	1.49155	high
SAMb15ac6e4c4ef	PR	CR/PR	11	M	WHITE	PREVIOUS	Visceral	bladder	Y	Y	1.5098	20.0082	0	II	1.29004	high
SAM28e6031ac18b	SD	SD/PD	22	M	WHITE	CURRENT	Liver	bladder	Y	N		9.23203	1	I	1.08355	low
SAMd86389d0d768	PD	SD/PD		M	WHITE	PREVIOUS	Visceral	bladder	Y	N	1.41176	2.20123	1	I	1.07093	low
SAM63b2189c36d7	PD	SD/PD	14	M	WHITE	CURRENT	Liver	bladder	Y	Y	0.980392	3.97536	1	I	1.27998	high
SAM18be5b395318	PD	SD/PD	5	M	WHITE	PREVIOUS	Liver	bladder	Y	Y	0.470588	9.00205	1	IV	1.17741	high
SAM0d855cff64e6	PD	SD/PD	4	F	WHITE	CURRENT	Visceral	bladder	Y	Y	0.137255	2.85832	1	IV	0.986319	low
SAM6cbc10abddb0	PD	SD/PD	3	M	WHITE	NEVER	LN Only	bladder	Y	Y	0.960784	5.94661	1	III	1.03454	low
SAMdee1011782cd	PD	SD/PD		M	WHITE	NEVER	Visceral	lymph node	Y	Y		3.90965	1	I	1.03889	low
SAMe9475f77504b	SD	SD/PD		M	WHITE	NEVER	Liver	bladder	Y	Y		18.6612	0	IV	0.631331	low
SAMa535fcdf18a0	PR	CR/PR	19	M	WHITE	PREVIOUS		bladder	Y	Y	0.882353	17.2813	0	I	0.710198	low
SAM7746b76437e6	NE		5	M	WHITE	PREVIOUS	Liver	bladder	Y	Y	0.392157	2.82546	1	I	1.06398	low
SAM548551ef782c	PR	CR/PR	11	M	WHITE	NEVER	Liver	bladder	Y	Y	1.82353	17.2813	0	IV	0.808868	low
SAM203dcf14f927	CR	CR/PR	13	M	WHITE	CURRENT	LN Only	bladder	Y	Y	2.39216	19.3511	0	II	1.59346	high
SAMe41b1e773582	PD	SD/PD	6	M	WHITE	NEVER		bladder	Y	Y	0.470588	0.854209	1	III	1.05319	low
SAM978a587b207e	PD	SD/PD		M	WHITE	CURRENT	LN Only	bladder	Y	N	1.92157	2.10267	1	II	1.10394	low
SAM5234688806a7	PD	SD/PD	13	M	WHITE	PREVIOUS	Liver	kidney	Y	Y	0.313725	5.8809	1	I	1.14218	high
SAM2c9586161ce6	PD	SD/PD	9	M	WHITE	NEVER	Visceral	bladder	Y	Y	0.431373	11.269	1	I	1.33796	high
SAM76a431ba6ce1	PD	SD/PD	6	M	WHITE	NEVER	Visceral	kidney	N		0.215686	14.1273	1	III	0.683501	low
SAM7a9093b9c7e9	NE		1	M	WHITE	NEVER		kidney	Y	Y	0.215686	1.80698	1	II	0.865042	low
SAM8f2275c36e8c	SD	SD/PD	5	M	WHITE	NEVER	Visceral	bladder	Y	Y		20.731	0	I	1.08015	low
SAMab8052a03398	SD	SD/PD		M	WHITE	NEVER	LN Only	lymph node	Y	N	0.0392157	13.306	1	III	0.759153	low
SAMd3bd67996035	CR	CR/PR	7	M	WHITE	PREVIOUS	LN Only	lymph node	Y	Y	1.56863	20.8296	0	II	1.002	low
SAMfddc359e862b	NE			F	WHITE	PREVIOUS		bladder	Y	Y		1.9384	1	II	1.29005	high
SAM753d4bb52dbe	SD	SD/PD	7	M	WHITE	CURRENT	Visceral	ureter	Y	Y		11.3676	1	I	0.926943	low
SAMd3601288319e	CR	CR/PR	14	M	OTHER	PREVIOUS	LN Only	other	Y	N	0.784314	23.1294	0	II	1.15444	high
SAM59f392864f5d	SD	SD/PD	14	M	OTHER	PREVIOUS	LN Only	bladder	Y	N		17.7741	1	II	0.723185	low
SAM26104d5adc89	SD	SD/PD	1	M	ASIAN	PREVIOUS	Visceral	bladder	N		0.27451	5.38809	1	III	0.733498	low
SAMba1a34b5a060	PD	SD/PD	5	M	WHITE	NEVER	Visceral	bladder	Y	N	0.901961	12.846	1	III	1.0001	low
SAM18a4dabbc557	PD	SD/PD	18	M	WHITE	PREVIOUS	Visceral	bladder	Y	Y	2.03922	16.46	1	II	1.2039	high
SAMfb7aec7cb0e2	PR	CR/PR		M	WHITE	PREVIOUS		bladder	Y	Y	5.92157	22.538	0	IV	1.2161	high
SAMfed609955db9	PD	SD/PD	7	F	WHITE	NEVER	Visceral	bladder	Y	Y	0.352941	20.5667	0	I	1.02969	low
SAMb8070b7937e7	SD	SD/PD	5	M	WHITE	PREVIOUS	Liver	bladder	Y	Y	0.333333	21.0267	1	I	1.24336	high
SAMf2aae1443f67	PD	SD/PD	7	F	WHITE	NEVER	Visceral	bladder	Y	Y	0.803922	10.3491	1	III	1.21074	high
SAM2bba8cb35e48	PD	SD/PD	11	M	WHITE	PREVIOUS	Liver	bladder	Y	Y	1.29412	10.4805	1	II	0.752345	low
SAMcee0fa8c05b4	NE		7	M	WHITE	PREVIOUS	Liver	bladder	Y	Y	1.37255	1.67556	1	II	1.62801	high
SAM5c139c5c1c4f	PD	SD/PD		M	WHITE	PREVIOUS	Liver	bladder	Y	Y		7.22793	1	III	1.24248	high
SAMc1251c7bfee2	PR	CR/PR	5	M	WHITE	PREVIOUS	Visceral	bladder	Y	Y	1.09804	21.6181	0	IV	0.931804	low
SAM6780ed436b55	PD	SD/PD	14	F	WHITE	PREVIOUS	Visceral	bladder	Y	Y	2.54902	6.2423	1	III	0.852818	low
SAM85f0a3ac1c45	PD	SD/PD	8	M	WHITE	CURRENT	Visceral	lung	Y	Y	0.27451	5.84805	1	III	0.903711	low
SAM9d2494119c05	PD	SD/PD		M	WHITE	NEVER	Liver	liver	Y	N		1.44559	1	I	0.812976	low
SAM9410b866974a	SD	SD/PD		M	WHITE	NEVER	LN Only	bladder	Y	N		6.73511	1	IV	0.845828	low
SAM5d989c86255e	PD	SD/PD	13	F	UNKNOWN	PREVIOUS	Liver	bladder	Y	N	1.41176	3.44969	1	III	0.691902	low
SAM27299aed7681	PR	CR/PR	8	F	UNKNOWN	NEVER		bladder	Y	Y	0.745098	18.8583	0	I	1.44672	high
SAM49d48750e294	PD	SD/PD	0	M	UNKNOWN	PREVIOUS	Visceral	bladder	Y	Y	0.607843	9.85626	1	II	0.857226	low
SAMd43f8933066b	PR	CR/PR	15	M	UNKNOWN	PREVIOUS	Visceral	bladder	Y	Y	1.88235	20.0082	0	II	0.873437	low
SAM7aa01fc49a80	PD	SD/PD		M	WHITE	PREVIOUS	Liver	bladder	N		1.03922	2.13552	1	II	0.69669	low
SAM0257bbbbd388	SD	SD/PD	18	M	WHITE	PREVIOUS	Visceral	bladder	Y	Y	4.68627	15.6386	1	II	1.59316	high
SAMc919aebc7fdd	PR	CR/PR	3	M	WHITE	NEVER	LN Only	bladder	Y	Y	0.607843	20.731	0	IV	0.893709	low
SAMa321770ac31c	PD	SD/PD	8	M	WHITE	PREVIOUS	Visceral	lymph node	Y	N	1.41176	7.06366	0	II	1.39734	high
SAM3894ac3956a5	PD	SD/PD	5	M	WHITE	PREVIOUS	Visceral	bladder	Y	Y		2.10267	0	I	0.969775	low
SAM3779e979db6b	NE			M	WHITE	CURRENT	Visceral	bladder	Y	Y		1.31417	1	I	0.903668	low
SAM1c0ecfb3eb63	PD	SD/PD		F	WHITE	PREVIOUS	Liver	bladder	Y			5.84805	1	III	0.779686	low
SAMbf91f27e7f9b	NE		3	M	WHITE	PREVIOUS	Liver	kidney	Y	Y		0.591376	1	I	0.981449	low
SAMbcb07ba81cee	PD	SD/PD		M	WHITE	PREVIOUS	Liver	bladder	Y	Y		2.52977	1	III	1.01659	low
SAM9aa6a095a9d6	PD	SD/PD	5	M	WHITE	PREVIOUS		kidney	Y	Y	0.647059	8.83778	1	I	1.09516	low
SAM957378bd907f	PD	SD/PD		M	WHITE	PREVIOUS	Liver	ureter	Y	N	0.196078	2.23409	1	II	0.975421	low
SAMf82bbdc267c8	PD	SD/PD	7	M	WHITE	CURRENT	Visceral	kidney	Y	Y	0.529412	3.12115	1	I	1.32073	high
SAM2624229effe8	PD	SD/PD	6	M	WHITE	PREVIOUS	Visceral	bladder	Y	Y	0.431373	2.56263	1	I	0.758975	low
SAMd2492b2a31bb	PD	SD/PD	3	F	WHITE	NEVER	LN Only	lymph node	Y	N	0.490196	7.85216	1	III	0.770895	low
SAM670649e105b5	CR	CR/PR	15	F	WHITE	NEVER	LN Only	bladder	Y	Y	2.68627	22.078	0	I	0.860471	low
SAM91c47b054ffb	PR	CR/PR	49	M	WHITE	PREVIOUS	Visceral	bladder	Y	N	2.70588	17.0185	1	II	1.29363	high
SAM491e341d5a82	NE		13	F	WHITE	NEVER	Visceral	bladder	Y	Y		1.87269	1	II	1.26369	high
SAM5fe7a81a39dd	PD	SD/PD	21	M	WHITE	CURRENT	LN Only	ureter	Y	N	3.82353	17.0842	1	II	1.16897	high
SAM29da928587ad	PD	SD/PD		F	WHITE	PREVIOUS	Visceral	ureter	Y	Y	0.490196	2.59548	1	III	0.811359	low
SAM0a0f2bac4b20	PD	SD/PD	2	M	WHITE	NEVER	Liver	kidney	Y	Y	0.215686	1.18275	1	III	0.71119	low
SAM8e469834acc1	PD	SD/PD	6	M	WHITE	NEVER	Liver	bladder	Y	Y		3.71253	1	I	1.07406	low
SAM8e43e9caf307	NE		4	F	WHITE	PREVIOUS	Liver	bladder	Y	Y	1	0.492813	1	II	1.07729	low
SAM99b1f6a9534e	NE		5	F	WHITE	PREVIOUS	Liver	bladder	Y	Y	1	0.492813	1	II	0.904016	low
SAM12502d970c10	SD	SD/PD	10	M	WHITE	PREVIOUS	Visceral	kidney	Y	Y	1.07843	7.3922	1	I	0.928653	low
SAM9681450bbc90	NE		21	M	WHITE	PREVIOUS	Visceral	bladder	Y	Y		4.96099	1	III	0.888473	low
SAM7d7c54623618	PR	CR/PR	8	M	WHITE	CURRENT	Liver	bladder	Y	N	2.09804	21.2238	0	II	1.04168	low
SAM181b638b8248	PD	SD/PD		M	WHITE	CURRENT	Liver	kidney	Y	Y	0.215686	10.8747	1	IV	0.615032	low
SAMbfdffb97c446	SD	SD/PD	6	F	WHITE	CURRENT	Visceral	bladder	Y	Y	1.45098	6.70226	1	IV	1.00632	low
SAM3b15b4c6311d	CR	CR/PR	44	M	WHITE	NEVER	Visceral	bladder	Y	Y	5.82353	21.4538	0	III	0.920017	low
SAM00b9e5c52da9	NE			M	WHITE	PREVIOUS	Visceral	bladder	Y	Y		1.90554	1	III	1.18071	high
SAM59b825252c0d	NE		15	M	WHITE	NEVER	LN Only	lymph node	Y	N		0.525667	1	III	1.04487	low
SAM1c8b086175ca	PD	SD/PD	7	M	WHITE	PREVIOUS	Visceral	bladder	Y	Y	0.54902	20.7639	1	I	0.758183	low
SAMeaa477a5384b	CR	CR/PR	14	M	WHITE	PREVIOUS		bladder	Y	Y	2.76471	21.5852	0	I	1.85323	high
SAM1dda30f1c5be	PD	SD/PD	20	M	WHITE	PREVIOUS		bladder	Y	Y	4.01961	21.2567	0	II	0.969985	low
SAM9eebdef2858a	NE			F	WHITE	NEVER	Liver	bladder	Y	Y		0.821355	1	IV	0.819965	low
SAM9daccafc18db	PD	SD/PD		F	WHITE	CURRENT	Visceral	kidney	Y	Y		16.46	0	III	1.04265	low
SAM2eb07dedf07f	PR	CR/PR	13	M	WHITE	PREVIOUS	Visceral	bladder	Y	Y	1.13725	20.501	0	II	0.917989	low
SAM25510f300d79	CR	CR/PR		M	WHITE	PREVIOUS	Visceral	other	Y	N	1.82353	20.6982	0	III	0.921496	low
SAMbda79f955628	SD	SD/PD	20	F	WHITE	PREVIOUS		bladder	Y	Y	1.2549	20.6324	0	II	0.918296	low
SAM9b9d48b0b02c	NE		5	M	WHITE	PREVIOUS	Liver	bladder	Y	Y	2.11765	2.89117	1	II	1.48372	high
SAMff41c4e8c08f	NE		14	M	WHITE	PREVIOUS	Visceral	bladder	Y	Y		2.46407	1	I	1.21701	high
SAMc97f35a29d16	NE		13	M	WHITE	PREVIOUS	Visceral	bladder	Y	Y		0.821355	0	II	1.02043	low
SAM187e056d6a2a	PD	SD/PD		M	WHITE	CURRENT	Visceral	lung	Y	N		2.29979	1	I	0.878973	low
SAMbc8dc3a7b54e	PD	SD/PD	7	F	WHITE	PREVIOUS	Visceral	bladder	N		0.745098	14.7515	1	II	1.97511	high
SAM7b40007f4aa4	PR	CR/PR	12	F	WHITE	NEVER	Visceral	ureter	N			21.6509	0	IV	1.38688	high
SAM568ce160abd9	SD	SD/PD		F	WHITE	PREVIOUS	Visceral	bladder	Y	N		12.846	1	III	0.648877	low
SAM14938611a2d3	PR	CR/PR	38	M	WHITE	PREVIOUS	LN Only	bladder	N		6.68627	21.4209	0	II	1.44129	high
SAM1a87df750b9d	SD	SD/PD	8	M	WHITE	PREVIOUS	Visceral	bladder	N		1.17647	5.38809	1	III	0.782339	low
SAMae02629a97f7	PD	SD/PD		F	WHITE	PREVIOUS	Liver	kidney	Y	N		3.25257	1	II	1.39004	high
SAM47fc46c3d6be	SD	SD/PD	8	M	WHITE	PREVIOUS	LN Only	bladder	N		0.803922	18.7269	0	IV	1.1305	high
SAM7829a341b9f3	PD	SD/PD	3	M	WHITE	PREVIOUS		bladder	N		0.745098	3.8768	1	IV	0.975312	low
SAM0f956e757453	PD	SD/PD	32	M	WHITE	PREVIOUS	Visceral	ureter	N		4.09804	10.4148	1	II	0.827327	low
SAMaf42c1541269	SD	SD/PD	14	M	WHITE	PREVIOUS	Liver	bladder	N		2.19608	5.51951	0	II	0.984035	low
SAM09c84ec0cf34	PD	SD/PD		M	WHITE	PREVIOUS	Liver		Y	N		6.50513	1	I	0.94498	low
SAM7538ad9ff524	SD	SD/PD	21	F	WHITE	PREVIOUS		bladder	N		2.39216	19.1211	0	III	1.2265	high
SAM95c70496ffb5	NE			F	OTHER	NEVER	Visceral	lymph node	Y	N		0.361396	1	III	0.921776	low
SAM7edacb3deb65	NE			M	WHITE	PREVIOUS	LN Only	kidney	N		0.647059	18.0041	0	II	1.22558	high
SAMb2e4a082541a	PD	SD/PD		F	WHITE	NEVER	Visceral	bladder	Y	N		4.36961	1	IV	0.992319	low
SAM771445e92421	CR	CR/PR		M	WHITE	NEVER	LN Only	bladder	Y	N	0.215686	19.4168	0	III	1.1674	high
SAM59fda9035d1d	PD	SD/PD		M	WHITE	NEVER	Visceral		Y	N		3.74538	1	IV	0.665954	low
SAM727c0e92a2a7	PR	CR/PR	1	M	WHITE	PREVIOUS	LN Only	lymph node	N		0.333333	18.7269	0	II	1.08108	low
SAM6f2a102a99df	CR	CR/PR	8	F	WHITE	NEVER			N		2.07843	19.2854	0	II	0.891777	low
SAMe56c96c51190	PD	SD/PD	5	F	WHITE	NEVER	Liver	kidney	N		0.0980392	9.7577	1	III	0.612118	low
SAM2b672f4336c7	SD	SD/PD	2	M	WHITE	NEVER	Visceral	kidney	N		0.156863	15.3101	1	I	0.970198	low
SAM1ab1b28d9f2b	PD	SD/PD	13	F	WHITE	PREVIOUS	Liver	ureter	N		0.294118	2.10267	1	II	0.790648	low
SAM1bcc62d8290c	NE		10	M	WHITE	PREVIOUS	Visceral	bladder	N		1.4902	18.6283	0	IV	1.39784	high
SAM6662f5181f87	PD	SD/PD	5	M	WHITE	PREVIOUS	Liver	bladder	N		0.490196	19.2854	0	I	0.935607	low
SAMe0c49ea0df5d	SD	SD/PD	2	F	WHITE	PREVIOUS	Visceral	bladder	N			4.13963	1	III	0.9345	low
SAM59289ca42c99	NE		4	M	WHITE	PREVIOUS	Liver	kidney	N		0.235294	1.70842	1	III	0.632564	low
SAM18b9351e265a	PD	SD/PD	7	M	BLACK OR AFRICAN AMERICAN	PREVIOUS	Liver	ureter	N		0.392157	15.8686	1	III	0.954606	low
SAM7fb7a13c096b	PD	SD/PD	11	M	ASIAN	CURRENT	Liver	kidney	N		0.764706	1.67556	1	II	1.0235	low
SAM87a8e18eb45b	PD	SD/PD	14	F	WHITE	NEVER	Visceral	bladder	N		0.313725	2.75975	1	I	1.09521	low
SAM1f3c93814cb9	NE		5	F	WHITE	PREVIOUS	Visceral	bladder	N		1.13725	1.44559	1	II	1.44943	high
SAM5fc9ae0aed1f	NE		6	M	WHITE	PREVIOUS	LN Only	bladder	N		2.01961	0.62423	1	IV	0.662987	low
SAM9725303dce0c	PD	SD/PD	22	M	WHITE	NEVER	Liver	bladder	N		4.43137	8.90349	0	II	1.42424	high
SAM6ff654a20f98	CR	CR/PR	6	M	WHITE	PREVIOUS		kidney	N		1.03922	18.5626	0	I	0.864434	low
SAM65afda25b920	SD	SD/PD	4	M	WHITE	CURRENT	Visceral	bladder	N		0.294118	8.08214	1	III	0.608863	low
SAMef0e3d2415fd	SD	SD/PD	1	M	WHITE	PREVIOUS	Visceral	lung	N		0.0392157	10.1191	1	IV	0.877547	low
SAM07a93a28f801	PR	CR/PR	18	M	WHITE	PREVIOUS	LN Only	bladder	N		2.11765	12.846	0	II	1.43286	high
SAM94859b440b1d	PD	SD/PD	11	M	BLACK OR AFRICAN AMERICAN	NEVER	Visceral	kidney	N		0.215686	13.3388	1	I	1.04946	low
SAM58e7832f4e7d	PR	CR/PR	2	M	WHITE	NEVER	Visceral	bladder	N		0.333333	16.46	0	I	1.55759	high
SAMc57eadb2d82b	PD	SD/PD	3	M	OTHER	NEVER	Visceral	bladder	Y		0.196078	8.01643	1	I	1.39162	high
SAMd5ab7fbfab4e	NE		35	M	WHITE	PREVIOUS	LN Only	bladder	Y	Y	4.64706	18.1027	0	II	1.10179	low
SAM5767dd75d142	PR	CR/PR	32	M	WHITE	NEVER		other	Y	Y		18.1684	0	IV	1.77884	high
SAMaabf4afe4213	PD	SD/PD	18	M	WHITE	NEVER	Visceral	lymph node	N		2	2.62834	1	II	0.870398	low
SAMcc7a42d87e9c	PR	CR/PR	26	F	WHITE	PREVIOUS	Visceral	ureter	N		4.96078	17.2156	0	I	1.34546	high
SAMce39dd79b441	PD	SD/PD	14	M	WHITE	PREVIOUS	Visceral	bladder	N		0.843137	6.27515	1	IV	0.758818	low
SAM75f12d1a55fc	SD	SD/PD	6	M	WHITE	PREVIOUS	Visceral	lung	Y	N	0.333333	14.7515	0	IV	1.13461	high
SAM6964a6d7b967	PD	SD/PD	5	M	WHITE	PREVIOUS	Visceral	bladder	N		1.17647	16.2628	1	II	1.27778	high
SAM3b1066e5801b	SD	SD/PD	2	M	WHITE	NEVER	LN Only	lymph node	Y	N	0.176471	15.6386	0	IV	1.12263	high
SAMf20b827dca51	PD	SD/PD	14	M	WHITE	NEVER	LN Only	kidney	Y	N	1.09804	4.36961	1	II	1.14131	high
SAM6792d6e98068	PD	SD/PD	17	M	BLACK OR AFRICAN AMERICAN	PREVIOUS	Liver	bladder	N		1.11765	6.01232	1	I	1.2528	high
SAM31d9176e11fb	CR	CR/PR	23	M	WHITE	NEVER	LN Only	bladder	N		4.23529	17.117	0	I	1.38355	high
SAM04c589eb3fb3	NE		50	M	WHITE	NEVER	Visceral	bladder	N			0.689938	0	III	0.932444	low
SAM5cc2d9036053	PD	SD/PD	11	M	WHITE	NEVER	LN Only	bladder	N		0.411765	5.68378	1	I	0.818726	low
SAMb8101c538753	SD	SD/PD	16	M	WHITE	PREVIOUS	Liver	bladder	N		3.76471	13.4045	1	IV	1.1827	high
SAM80c6183220e6	PD	SD/PD	8	M	WHITE	CURRENT	LN Only	kidney	N		0.215686	14.7515	0	III	0.927489	low
SAM572f19794c96	CR	CR/PR	33	M	WHITE	PREVIOUS	Visceral	kidney	N		5.5098	16.8214	0	III	0.8025	low
SAM1abf01dd4544	PR	CR/PR	16	M	WHITE	PREVIOUS	Visceral	kidney	N		1.86275	16.8542	0	II	0.785611	low
SAM1f83ebd6be9b	PD	SD/PD	6	M	WHITE	NEVER	Liver	kidney	N		0.54902	3.5154	1	I	1.11795	low
SAM1f66db567eb5	PR	CR/PR	38	M	WHITE	CURRENT	Liver	bladder	Y	N	4.5098	16.5914	0	III	0.632557	low
SAM4918c524b83a	NE		14	M	WHITE	CURRENT	Visceral	bladder	N			0.62423	0	I	0.746316	low
SAMa0ca029b7afd	NE		12	M	WHITE	PREVIOUS	Visceral		N		0.745098	0.361396	1	II	1.02822	low
SAM6157c8f38b72	PR	CR/PR	9	M	WHITE	PREVIOUS	Visceral	bladder	N		1.80392	16.5914	0	I	0.81572	low
SAMe7e4f7c076a7	PD	SD/PD	1	M	WHITE	PREVIOUS	Visceral	bladder	N		0.196078	1.97125	1	IV	0.747116	low
SAMbe25e2c88f3e	NE			M	WHITE	PREVIOUS	LN Only	lymph node	N			2.92402	1	IV	1.44812	high
SAM4caabd64e7fd	PR	CR/PR	59	M	WHITE	PREVIOUS		ureter	N		11.6863	15.7043	0	III	1.06104	low
SAMc6eff056c89a	PD	SD/PD	3	M	WHITE	PREVIOUS	LN Only	lymph node	N		0.45098	1.80698	1	III	1.16199	high
SAM5cfa1699bdb7	PD	SD/PD	10	M	WHITE	PREVIOUS	Visceral	liver	Y	N	1.21569	15.8357	0	II	0.939043	low
SAMda4d892fddc8	PD	SD/PD	4	M	WHITE	PREVIOUS	Visceral	kidney	N		0.27451	14.1273	0	IV	0.777083	low
SAM3a1c9632ff7b	SD	SD/PD		M	WHITE	NEVER	Visceral	lung	N			16.0329	0	II	0.860884	low
SAM8b4b8b0f9e73	SD	SD/PD	7	M	WHITE	PREVIOUS	LN Only	kidney	N		1	15.6715	0	I	0.9677	low
SAMe3d4266775a9	PD	SD/PD		M	WHITE	PREVIOUS	Visceral	bladder	Y	Y		13.9959	0	I	1.18414	high
SAM2de7cffb5f72	NE			M	WHITE	PREVIOUS	LN Only	bladder	Y	Y		1.83984	1	II	1.11624	low

## Sheet: Riaz, et al
Patient	Cohort	Response	event	times	Subtype	Mutation.Load	Neo-antigen.Load	Neo-peptide.Load	Cytolytic.Score	Senescore	Senescore_group
Pt1	Anti-PD1/PD-L1 therapy	PD	1	5.71429	CUTANEOUS				977.869	0.475936	low
Pt10	Anti-PD1/PD-L1 therapy	SD	1	9.14286	CUTANEOUS	75	33	56	65.8407	0.144251	low
Pt101	Anti-PD1/PD-L1 therapy	PR	0	29.7857	CUTANEOUS	10	5	6	1392.14	49.1689	high
Pt103	Anti-PD1/PD-L1 therapy	PD	0	17.2857	CUTANEOUS	21	5	11	1108.86	0.02251	low
Pt106	Anti-PD1/PD-L1 therapy	PD	1	3.25	MUCOSAL	700	219	273	645.542	0.00405695	low
Pt11	Anti-PD1/PD-L1 therapy	PD	1	29.8929	CUTANEOUS	106	67	187	602.674	0.162379	low
Pt17	Anti-PD1/PD-L1 therapy	PD	1	2.03571	CUTANEOUS	20	13	32	20.9045	0.098171	low
Pt18	Anti-PD1/PD-L1 therapy	PR	0	38.3214	CUTANEOUS	217	137	311	907.568	2.1277	high
Pt2	Anti-PD1/PD-L1 therapy	SD	1	9.82143	OTHER				746.033	0.000696634	low
Pt23	Anti-PD1/PD-L1 therapy	NE	1	1.85714	CUTANEOUS	646	392	865	754.305	5.6556e-14	low
Pt24	Anti-PD1/PD-L1 therapy	PD	0	5.32143	OTHER	1	1	1	423.337	0.000358455	low
Pt26	Anti-PD1/PD-L1 therapy	SD	0	34	MUCOSAL	125	86	271	61.3351	0.293162	low
Pt27	Anti-PD1/PD-L1 therapy	PD	1	16.9643	CUTANEOUS	183	119	321	233.666	0.01178	low
Pt28	Anti-PD1/PD-L1 therapy	PD	1	26.4286	CUTANEOUS	42	16	26	277.48	0.12651	low
Pt29	Anti-PD1/PD-L1 therapy	PD	1	9.75	OTHER	412	238	581	207.889	0.0328744	low
Pt3	Anti-PD1/PD-L1 therapy	PR	0	40.8571	CUTANEOUS	182	119	346	36.3318	4.55405e-05	low
Pt30	Anti-PD1/PD-L1 therapy	CR	0	37.6071	MUCOSAL	66	35	86	64.9692	1.68147	high
Pt31	Anti-PD1/PD-L1 therapy	PD	0	34.3214	OTHER	450	294	870	368.904	0.0435544	low
Pt34	Anti-PD1/PD-L1 therapy	PR	0	29.7857	CUTANEOUS	212	144	368	1653.68	0.0626558	low
Pt36	Anti-PD1/PD-L1 therapy	SD	0	38.6071	CUTANEOUS	2	1	1	112.841	1.38951e-10	low
Pt37	Anti-PD1/PD-L1 therapy	SD	1	23.0714	CUTANEOUS	29	19	46	116.636	0.0156697	low
Pt38	Anti-PD1/PD-L1 therapy	SD	1	5.96429	CUTANEOUS	449	290	893	25.4951	0.0828566	low
Pt39	Anti-PD1/PD-L1 therapy	PD	1	5.92857	MUCOSAL				6.9282	0.0323392	low
Pt4	Anti-PD1/PD-L1 therapy	SD	1	22.6071	CUTANEOUS	285	151	315	478.623	0.126506	low
Pt44	Anti-PD1/PD-L1 therapy	PR	0	39.0357	MUCOSAL	365	232	510	1084.92	0.000745164	low
Pt46	Anti-PD1/PD-L1 therapy	PD	1	8.10714	OTHER	180	105	163	904.312	0.345571	low
Pt47	Anti-PD1/PD-L1 therapy	PD	1	25.6429	CUTANEOUS	1005	491	871	217.486	1.49842e-06	low
Pt48	Anti-PD1/PD-L1 therapy	CR	0	37.3571	CUTANEOUS	99	63	167	233.897	1.5394e-14	low
Pt49	Anti-PD1/PD-L1 therapy	PR	0	29.5357	CUTANEOUS	852	529	1766	1380.25	3.1948e-05	low
Pt5	Anti-PD1/PD-L1 therapy	PD	1	7.92857	CUTANEOUS	52	13	26	1002.09	23.3701	high
Pt52	Anti-PD1/PD-L1 therapy	PD	1	17	CUTANEOUS	353	236	631	188.966	6.30989e-11	low
Pt59	Anti-PD1/PD-L1 therapy	SD	1	25.2857	CUTANEOUS	432	220	478	1355.33	0.0702888	low
Pt62	Anti-PD1/PD-L1 therapy	PD	1	16.8571	OCULAR/UVEAL				36.8782	0.371259	low
Pt65	Anti-PD1/PD-L1 therapy	SD	0	24.7143	ACRAL	2619	1570	3880	380.4	0.000472876	low
Pt66	Anti-PD1/PD-L1 therapy	PD	1	19.3571	CUTANEOUS	153	92	236	83.4745	0.375149	low
Pt67	Anti-PD1/PD-L1 therapy	SD	0	36.8571	OCULAR/UVEAL	16	9	21	215.188	0.774603	high
Pt72	Anti-PD1/PD-L1 therapy	PR	1	27.5	CUTANEOUS	437	302	710	16.9706	3.93181e-08	low
Pt76	Anti-PD1/PD-L1 therapy	NE	1	0.357143	CUTANEOUS	224	141	337	167.809	8.88105e-15	low
Pt77	Anti-PD1/PD-L1 therapy	SD	1	16.8214	CUTANEOUS	49	27	55	870.995	0.0104941	low
Pt78	Anti-PD1/PD-L1 therapy	PD	1	2.78571	CUTANEOUS				4.58258	0.000693279	low
Pt79	Anti-PD1/PD-L1 therapy	SD	1	7.78571	OTHER	544	328	668	197.547	0.15194	low
Pt8	Anti-PD1/PD-L1 therapy	PD	1	9.25	MUCOSAL	87	44	69	457.436	3.7867e-05	low
Pt82	Anti-PD1/PD-L1 therapy	SD	1	15.3214	OCULAR/UVEAL	33	14	25	228.613	0.00645172	low
Pt84	Anti-PD1/PD-L1 therapy	PD	1	5.39286	OTHER	11	10	41	9.38083	0.0216539	low
Pt85	Anti-PD1/PD-L1 therapy	PD	0	32.2857	CUTANEOUS	129	85	180	5.47723	0.0460766	low
Pt89	Anti-PD1/PD-L1 therapy	SD	1	30.1429	CUTANEOUS	214	115	199	167.368	0.000170049	low
Pt9	Anti-PD1/PD-L1 therapy	PD	1	3.28571	CUTANEOUS	409	246	615	58.4808	3.36696e-06	low
Pt90	Anti-PD1/PD-L1 therapy	PD	1	6.21429	MUCOSAL	283	162	302	1006.52	2.2729e-05	low
Pt92	Anti-PD1/PD-L1 therapy	SD	1	11.8929	CUTANEOUS	642	388	1086	1562.97	0.439091	low
Pt94	Anti-PD1/PD-L1 therapy	CR	0	35.0357	CUTANEOUS	405	239	544	370.216	0.00126617	low
Pt98	Anti-PD1/PD-L1 therapy	SD	1	26.6786	OCULAR/UVEAL	20	13	23	98.1071	0.692205	high
